# Supplementary material for: Redox- and pH-responsive emulsions based on TiO2 nanoparticles and ferrocene derivates
Source: Royal Society of Chemistry journal article supplement (doi:10.1039/d2nj03500f), 2022-01-01
Supplement: d2nj03500f1.pdf [file d2nj03500f1.pdf]

## Supporting Information

### Redox and pH-responsive emulsions based on TiO<sub>2</sub> nanoparticles and ferrocene derivatives

Shujin Ge,<sup>a</sup> Shang Zhang,<sup>a</sup> Xiuji Chang<sup>a</sup>, Aixiang Li<sup>a</sup>, Weiwei Wang<sup>a</sup>, Qihong Li<sup>\*a</sup> and Zhaodong Wang<sup>\*b</sup>

<sup>a</sup> School of Materials Science and Engineering, Shandong University of Technology, Zibo, Shandong 255049, PR China

<sup>b</sup> Dezhou Linglong Tire Co., Ltd, Dezhou, Shandong 253000, PR China

#### Synthesis of FcA

The preparation of surfactant FcA was based on the literature with some minor changes.<sup>1,2</sup> Firstly, acetylferrocene-hydrazone (FcH) was synthesized at 70 °C under N<sub>2</sub> atmosphere using acetylferrocene (4 mmol) and hydrazine hydrate (970 μL) as reactants and a few drops of glacial acetic acid as catalyst. <sup>1</sup>H-NMR characterization of FcH (Fig. S1): 5.86 (2H, -NH<sub>2</sub>), 4.45, 4.21, 4.11 (9H, -Fc), 1.93(3H, -CH<sub>3</sub>). The obtained FcH (2 mmol) dissolved in 20 mL chloroform was added into a three-necked flask, then 10 mL chloroform solution containing 9-anthraldehyde (3 mmol) was added dropwise under stirring followed by refluxing for 6 h under N<sub>2</sub> atmosphere. The reaction was carried out at 65 °C. The resulting solution was cooled to room temperature and placed in the refrigerator at 5 °C for 24 h. Then, the ferrocene derivate FcA was obtained. <sup>1</sup>H-NMR characterization of FcA (Fig. S2): δ 2.18 (s, 3H), 4.19 (s, 5H), 4.27 (t, 2H), 4.37 (t, 2H), 7.57 (t, 2H), 7.66 (t, 2H), 8.10 (d, 2H), 8.62 (s, 1H), 8.89 (d, 2H), 10.15 (s, 1H).

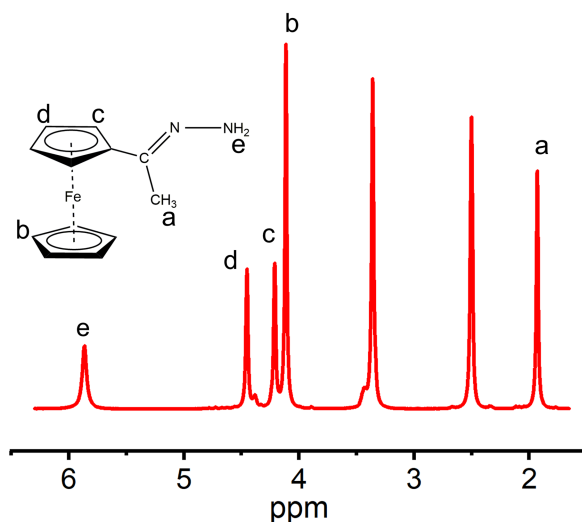

Fig. S1 <sup>1</sup>H NMR spectrum of FcH in DMSO.

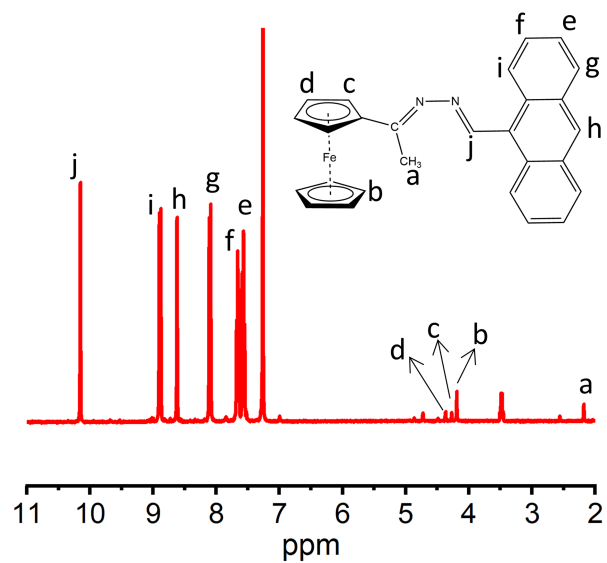

Fig. S2  $^1\text{H}$  NMR spectrum of FcA in  $\text{CDCl}_3$ .

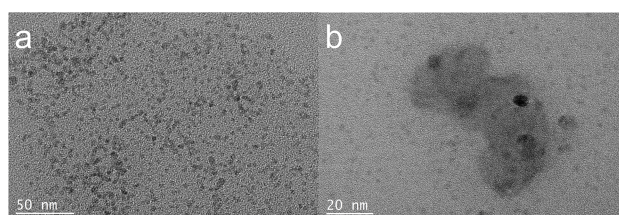

Fig. S3 TEM image of  $\text{TiO}_2$  nanoparticles.

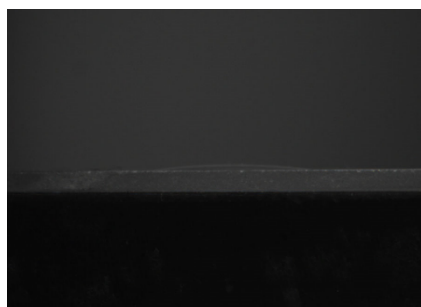

Fig. S4 Photograph of contact angle of pure  $\text{TiO}_2$  nanoparticles.

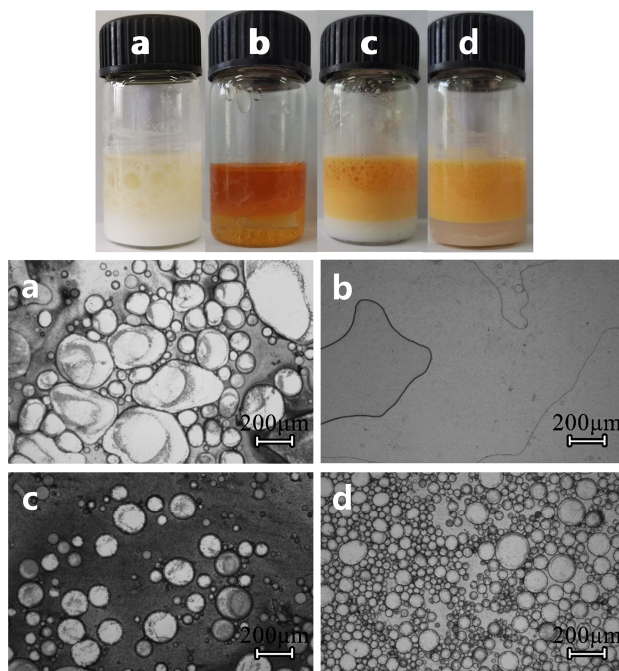

Fig. S5 Photographs of emulsions stabilized by (a)  $\text{TiO}_2$  nanoparticles (0.1 wt%) alone, (b)  $\text{Fc}^+\text{A}$  (1mM) alone, (c)  $\text{TiO}_2$  nanoparticles (0.1 wt%) and  $\text{FcA}$  (1mM) and (d)  $\text{TiO}_2$  nanoparticles (0.1 wt%) and  $\text{Fc}^+\text{A}$  (1mM).

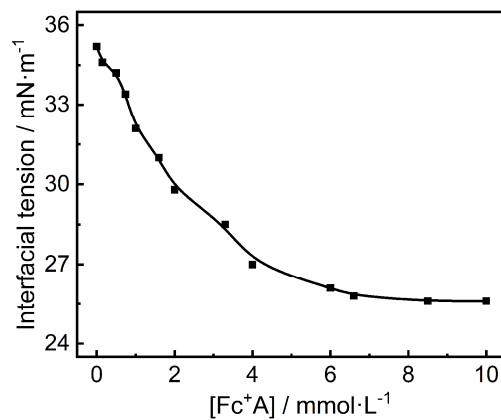

Fig. S6 Interfacial tension of toluene-water system in the presence of different concentrations of  $\text{Fc}^+\text{A}$ .

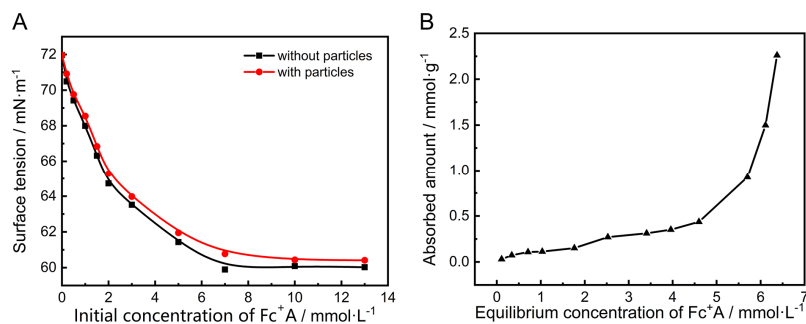

Fig. S7 The surface tension (A) of aqueous solutions of Fc<sup>+</sup>A without and with 0.15 wt% TiO<sub>2</sub> nanoparticles as a function of initial Fc<sup>+</sup>A concentration and the adsorption isotherm (B) of Fc<sup>+</sup>A at the TiO<sub>2</sub> nanoparticles-water interface as a function of equilibrium Fc<sup>+</sup>A concentration.

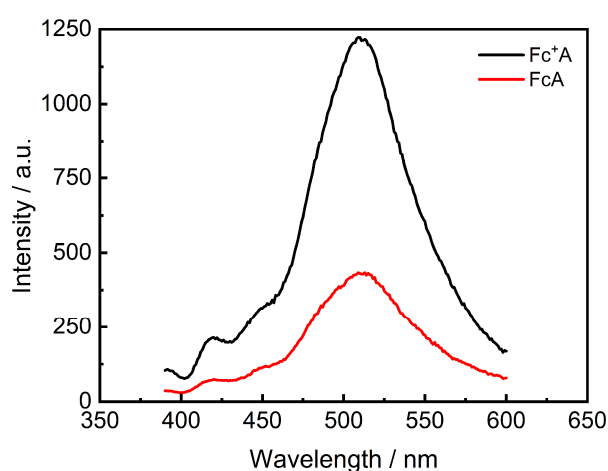

Fig. S8 Fluorescence spectra of FcA and Fc<sup>+</sup>A.

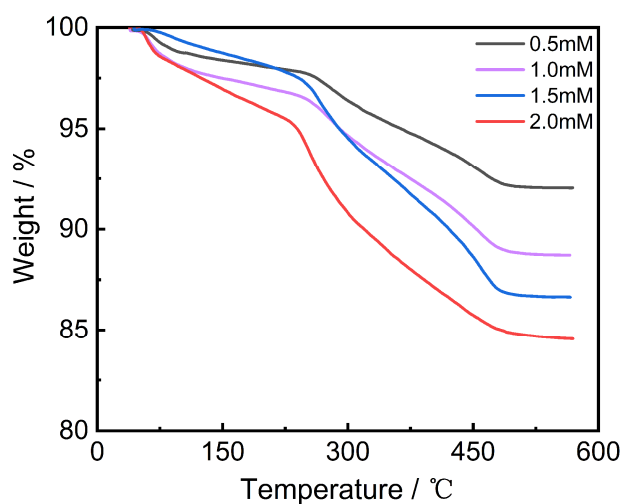

Fig. S9 TGA curves of the particle emulsifiers obtained by centrifuging the emulsions stabilized by 0.15wt% TiO<sub>2</sub> nanoparticles and Fc<sup>+</sup>A with different concentration.

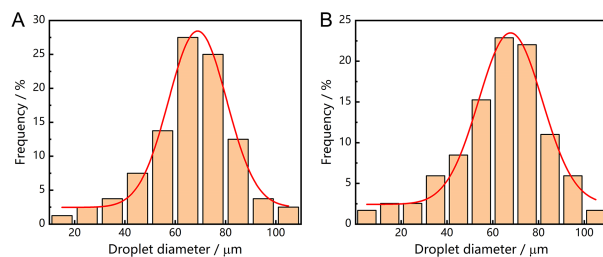

Fig. S10 The size-distribution histograms and corresponding photographs of emulsions stabilized by 0.15 wt% TiO<sub>2</sub> nanoparticles in combination with 2.0 mM Fc<sup>+</sup>A in 7 d (A) and one month (B).

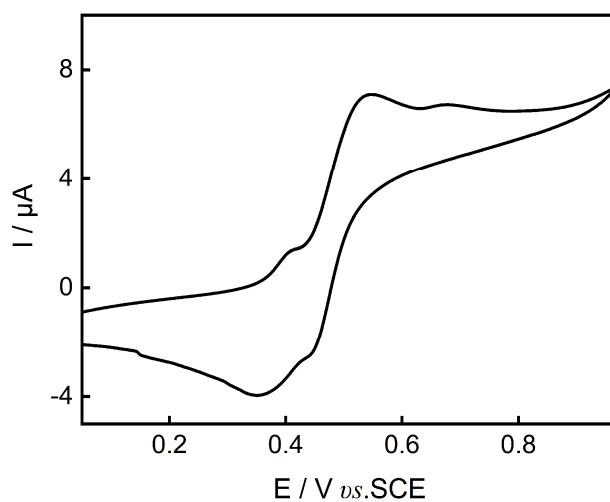

Fig. S11 Cyclic voltammogram of FcA measured in 0.1 mol·L<sup>-1</sup> KCl solution at room temperature with scan rates of 0.05V·s<sup>-1</sup>.

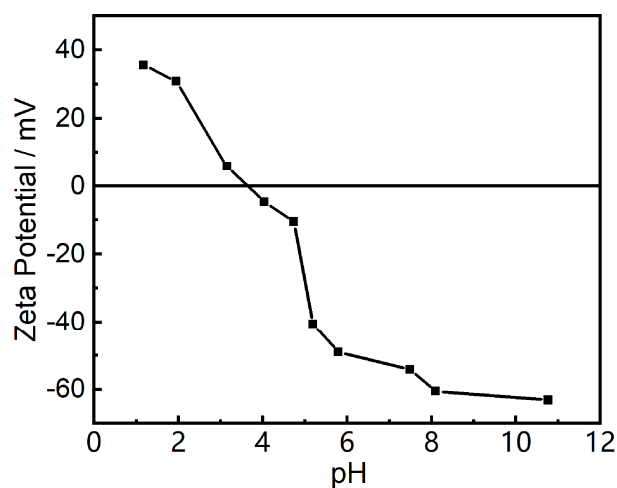

Fig. S12 Zeta potential of TiO<sub>2</sub> nanoparticles in aqueous suspensions with different pH values.

## References

- [1] Q. Y. Jiang, N. Sun, Q. H. Li, W. M. Si, J. Li, A. X. Li, Z. L. Gao, W. W. Wang and J. R. Wang, *Langmuir*, 2019, **35**, 5848-5854.
- [2] P. Tan, A. H. Yu, J. Yan, Y. S. Mi, J. Z. Li and J. N. Xiang, *Chem. J. Chin. Univ.*, 2011, **32**, 1083-1087.
